# Supplementary material
Source: ML conference proceedings conference paper supplement (https://openreview.net/forum?id=NUDaln2vCe)
Supplement: supplementary_material [file 27231_BREAD.pdf › 27231_BREAD/27231_BREAD.pdf]

---

# BREAD: Enhancing SLM Reasoning by Bridging Supervised and Reinforcement Learning

---

Anonymous Author(s)

Affiliation

Address

email

## Abstract

Small language models (SLMs) struggle to learn complex reasoning behaviors, especially when high-quality traces are scarce or difficult to learn from. A typical approach for training such models combines a supervised fine-tuning (SFT) stage, often to distill reasoning capabilities from a larger model, followed by a reinforcement learning (RL) stage such as Group Relative Policy Optimization (GRPO). In this paper, we investigate the fundamental limitations of this SFT + RL paradigm and propose methods to overcome them. Using a toy student-expert model over Markov chains, we demonstrate that the SFT + RL strategy can fail completely when (1) the expert’s traces are too difficult for the small model to express, or (2) the small model’s initialization achieves exponentially sparse rewards as task complexity grows. To address these, we introduce BREAD, a GRPO variant that bridges SFT and RL via partial expert guidance and branch rollouts. When self-generated traces fail, BREAD adaptively inserts short expert prefixes/hints, allowing the small model to complete the rest of the reasoning path, and ensuring that each update includes at least one successful trace. This mechanism both densifies the reward signal and induces a natural learning curriculum. BREAD requires fewer than 40% of ground-truth traces, consistently outperforming standard GRPO while speeding up the training by about  $3\times$ . Importantly, we find that BREAD helps the model solve problems that are otherwise unsolvable by the SFT + RL strategy, highlighting how branch rollouts and expert guidance can aid SLM reasoning.

## 1 Introduction

Over the past few years, we have witnessed a significant push toward enhancing language model reasoning, which has led to highly capable frontier models such as OpenAI o1 [13], Gemini 2.5 [14], and DeepSeek R1 [10]. These models can generate longer chain-of-thought (CoT) traces and utilize more test-time compute to tackle challenging tasks [19]. Despite these innovations, reasoning with small language models (SLM) remains a challenge. For instance, the large DeepSeek-R1 [10] has 671B parameters in total whereas the SFT-distilled model sizes range from 1.5B to 70B, and their performance substantially degrades at the 1.5B model (see Table 5 in [10]).

This work studies optimization strategies to enhance SLMs, with emphasis on reasoning tasks. Two popular optimization strategies for training LLMs are supervised fine-tuning (SFT) and reinforcement learning (such as GRPO or proximal policy optimization). Often, an SFT phase is employed, followed by an RL phase. While this two-stage procedure has found success, for SLMs, long context reasoning problems can pose unique challenges due to the misalignment between the expert and student models and potentially sparse rewards.

For example, consider a scenario in which each token generated by an expert/teacher model requires the smaller student model to produce  $K$  intermediate tokens to express it. In other words, the expert

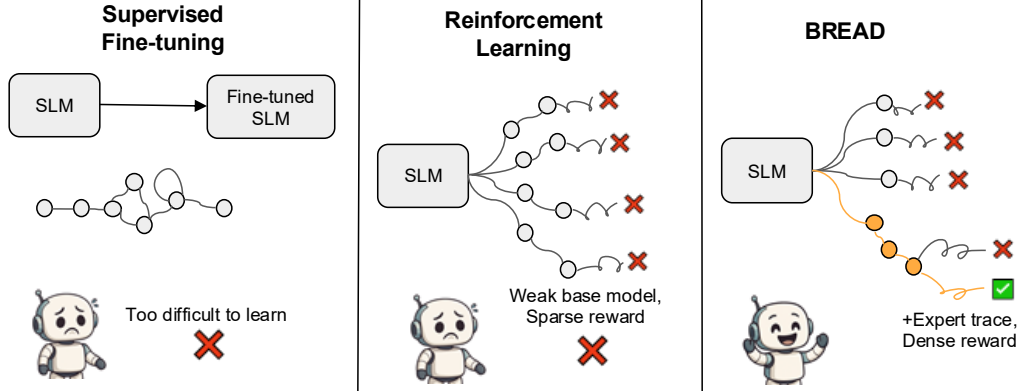

Figure 1: High-level overview of approaches. In existing training methods like supervised fine-tuning (left), high-quality reasoning traces produced by LLMs are often too complex for SLMs to imitate, so they deliver little benefit and can even hurt SLM reasoning capability. Since the subsequent RL phase starts from this weak starting point, the two-stage SFT+RL procedure often fails. In reinforcement learning (center), when the initial policy generates incorrect traces, the rewards are sparse, causing slow or ineffective learning. We propose BREAD (right), which uses part of an expert trace as an anchor, then generates additional rollouts that branch from its intermediate episodes. These branched trajectories provide denser, higher-quality feedback, helping SLMs learn robust reasoning strategies. Each dot represents a single episode, and the yellow trajectory is the expert trace.

thinks and outputs  $K$  steps ahead, from the student’s point of view. In practice, this situation can arise when the expert model is a  $\times K$  deeper/looped version of the student. Naturally, such expert traces might be too challenging for the small model to learn from<sup>1</sup>. On the other hand, success of the RL phase often relies on a good supervised initialization during the SFT phase. In Section 3.1, we provide a mathematical setting capturing this intuition and demonstrate that SFT+RL can fail for small models (see Figure 3), especially on difficult problems.

To address the difficulties of small models in learning from complex traces during fine-tuning, we propose our algorithm, **Branch Rollouts and Expert Anchors for Densified rewards**, depicted in Figure 1. BREAD gracefully integrates the SFT and RL phases by anchoring the optimization process with the expert traces, while allowing the small base model to acquire progressively more flexibility as it becomes a stronger problem solver. Assuming an expert trace is available (e.g. by querying a large expert model), BREAD updates the model with a correct trace; however, its traces are progressively more self-generated.

**Contributions:** Our specific contributions are as follows:

- **Methodology:** We introduce BREAD as a GRPO variant integrating SFT and RL phases, while inducing a learning curriculum along the reasoning trace. To motivate BREAD, we introduce a toy student-expert model using Markov chains. This task demonstrates how the expert’s trace can be uninformative for the student model and how the subsequent RL phase can fail due to sparse rewards. In contrast, BREAD solves this task efficiently.
- **Empirical impact:** Our experimental results show that BREAD matches or surpasses SFT + vanilla GRPO while using  $\approx 20\%$  of the correct trace tokens. By reducing both the number of rollouts and the total optimization steps, BREAD lowers overall training compute by  $\approx 75\%$  relative to vanilla GRPO. Additionally, we construct a slice of difficult problems and demonstrate that BREAD, when trained over this set, achieves substantially higher accuracy compared to SFT+GRPO. Finally, we provide an empirical study of how branching rollouts from expert hints (i.e., using only parts of the expert trace) densify the reward signal.

The rest of the paper is organized as follows: Section 2 discusses the related work on language model reasoning and traditional RL methods. Section 3 explains our algorithm BREAD, which also contains the observations inspiring our algorithm design. Section 4 presents and discusses our main experiment results to demonstrate the effectiveness of BREAD. Section 5 concludes the paper and discusses the limitation and future directions to improve in this domain.

<sup>1</sup>In practice, SFT+RL can work well for much of the dataset but might fail on a subset of difficult problems. See Section 4.1 for empirical evidence and evaluations.

## 2 Related Work

**Supervised fine-tuning (SFT) and Reinforcement Learning (RL).** Recently, there is a debate about whether SFT or RL can truly improve the reasoning ability of language models (LMs). With the emergence of [28, 10, 31], more and more reinforcement finetuned reasoning models demonstrate the importance of RL in reasoning tasks. [5] prove that RL can enhance the reasoning ability of LMs while SFT can only force LMs to memorize knowledge. However, [36] argues that the base model already has the reasoning ability while Reinforcement Learning with Verifiable Rewards (RLVR) barely increases the probability of correct reasoning trace. Furthermore, distillation works such as [10, 19] prove that SFT can help SLMs acquire reasoning capability comparable to the expert/teacher models. While the current popular pipeline to train a reasoning LM is SFT followed by RL, we argue the need for stronger integration of SFT and RL because, for hard questions, the expert solution might not be suitable for base models to learn while RL can struggle to discover even a single correct trace.

**Efficient RL and Reasoning.** While reasoning LMs become more powerful, computation is more demanding during the training and deployment procedure. Therefore, researchers recently paid more attention to efficient reasoning in both directions. Pivotal Token Search (PTS) [1] accelerates the Direct Preference Optimization (DPO) [22] training by identifying tokens in a language model generation that significantly impact the probability of success for the reasoning task. Following the memory efficiency but training time inefficiency introduced by GRPO [28, 10], many follow-up works improve the training convergence speed, including DAPO [35], CPPO [18], PODS [34] and DUMP [33]. [31, 37, 2] saves the token usage during inference by training with one or multiple levels of length penalty. Meanwhile, meta reinforcement fine-tuning (MRT) [21] makes inference token wasted less in meaningless reasoning steps by making the success rate steadily increase with the number of reasoning episodes. Compared with all of these previous works, we not only decrease the supervised signals during training by only introducing an expert solution when the current model cannot solve the current task with a probability relatively high enough, but guide the model with the expert hint to increase the RL training efficiency. which can provide a denser reward for speeding up the RL training procedure.

**Related classical RL methods.** DAGger [24] intermittently injects expert actions to correct agent behavior. Instead, BREAD adaptively inserts expert hints only when the agent fails and allows the model to complete the remaining of the reasoning trace, allowing for a natural curriculum. Go-Explore [6] trains an agent that can solve all Atari games by branching from intermediate states, while BREAD branches out from expert traces. Methods like Hindsight Experience Replay (HER) [3] and potential-based reward shaping (PBRS) [20] densifies learning signals under sparse rewards through goal relabeling or external shaping functions, but BREAD can achieve a similar effect through hint-based rollout initialization. Finally, while prior works like Kickstarting [27] and Expert Iteration [4] explore teacher-student transfer via full trajectories or alternating control, BREAD explicitly focuses on sparse expert intervention with minimal demonstrations.

## 3 Proposed Method: BREAD

In this work, we propose the **Branch Rollouts and Expert Anchors for Densified RL (BREAD)** algorithm. We will first describe the algorithm at a high level, followed by a mathematical toy model example (Section 3.1), and the key observations (Section 3.2, Section 3.3) that support its design.

In BREAD, for each question  $q$  paired with the answer  $a$ , the workflow of BREAD is shown in Figure 2 and proceeds as follows:

1. **Regular rollout:** Sample a group of  $G$  rollouts  $\{o_i\}_{i=1}^G$ .
2. **Episode anchor search:** If the success rate of the initial group is too low (e.g. lower than a threshold), do a binary search to find a short hint  $\rho$  that contains the ‘‘Expert Anchor’’ in the expert solution. ‘‘Expert Anchor’’ means the success rate of a new sampled output group  $\{o'_i\}_{i=1}^G$ , resulting from the question appended with the hint from the expert trace  $(q, \rho)$ , is within a pre-defined range.
3. **Policy updates:** Optimize the policy via the following objective:

$$\mathcal{J}^{\text{BREAD}}(\theta) = \mathbb{E}_{(q, \rho, a) \sim \mathcal{D}, \{o_i\}_{i=1}^G \sim \pi_{\text{old}}(\cdot | (q, \rho))} \left[ \frac{1}{G} \sum_{i=1}^G \frac{1}{|o_i|} \sum_{t=1}^{|o_i|} \left( \min \left( r_{i,t}(\theta) \hat{A}_{i,t}, \text{clip} \left( r_{i,t}(\theta), 1 - \varepsilon, 1 + \varepsilon \right) \hat{A}_{i,t} \right) - \beta D_{\text{KL}}(\pi_{\theta} || \pi_{\text{ref}}) \right) \right], \quad (1)$$

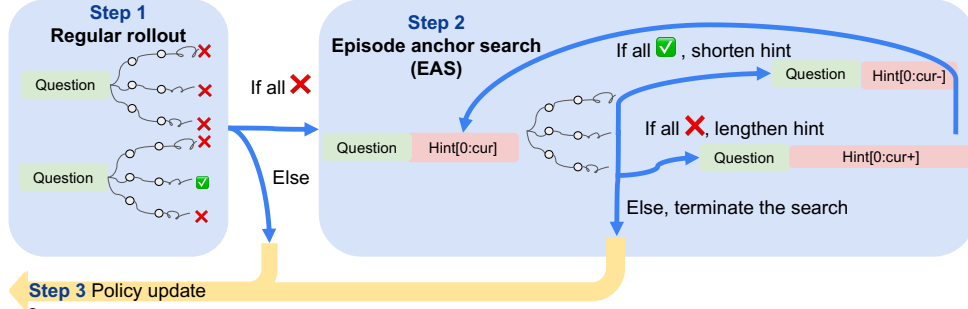

Figure 2: Workflow of BREAD. (1) **Regular rollout**: Given a question  $Q$ , sample a group of rollouts. If the sampled rollouts contain correct reasoning trace, use this group of rollouts to do the **policy updates**. Otherwise, go to step (2) **Episode anchor search**: Starting with the whole expert trace (provided by the ground truth or from the correct responses generated by LLMs) as the search space for potential suitable hints, construct a hint using the first half of the expert trace, append it to the question  $q$ , and sample a group of rollouts. If all the rollouts are correct, shorten the hint to contain fewer episodes and repeat the process; if all rollouts are wrong, lengthen the hint; otherwise, use the current rollouts to do the **policy update**.

where

$$r_{i,t}(\theta) = \frac{\pi_{\theta}(o_{i,t}|q, \rho, o_{i< t})}{\pi_{\text{old}}(o_{i,t}|q, \rho, o_{i< t})}, \quad \hat{A}_{i,t} = \frac{r_i - \text{mean}(\{R_i\}_{i=1}^G)}{\text{std}(\{R_i\}_{i=1}^G)} \quad (2)$$

The details of the algorithm can be found in Algorithm 1. Next, we will discuss the key observations that motivate the design of BREAD.

### 3.1 Exploring and Contrasting SFT, RL, and BREAD under a Toy Model

It is known that a  $T$  times deeper LLM can internally simulate  $T$  chain-of-thought steps of a smaller LLM [26]. This implies that the expert model can generate a dense reasoning trace which necessitates a  $T \times$  longer simplified trace for the student model to digest via SFT. Recent work [17] makes related empirical observation that SLMs can struggle to learn from strong reasoners. We propose modeling this phenomena through Markov chains as follows: Imagine a Markov chain with  $K \times K$  transition matrix. The expert/strong model has access to the full transition matrix, while the student model are forbidden from implementing certain state transitions. Denote the learnable state transitions by  $\mathcal{P} \subset [K] \times [K]$  where  $[K] = \{1, 2, \dots, K\}$  and consider the following navigation task:

**Navigation Task**: Start a trace from State 1. Obtain a reward of 1 upon reaching State  $K$ .

For simplicity, suppose the expert generates a deterministic path  $[\alpha_0 = 1, \alpha_1, \alpha_2, \dots, \alpha_{T-1}, \alpha_T = K]$  where  $\alpha_t \in [K]$  for  $0 \leq t \leq T$ . During SFT, small model will only benefit from the expert model's trace when the expert transitions  $(\alpha_t, \alpha_{t+1})$  are learnable, i.e.,  $(\alpha_t, \alpha_{t+1}) \in \mathcal{P}$ . If no transition lies in  $\mathcal{P}$  for  $t = 0, 1, \dots, T-1$ , the small model cannot learn from SFT.

Without a good SFT-induced initialization, pure RL is known to suffer from sparse rewards [32]. In the context of the Navigation Task, further suppose that the small model can at most jump  $d$  steps away from the current state, i.e.,  $|j - i| \leq d$  for all  $(j, i) \in \mathcal{P}$ . This implies that we can only learn from

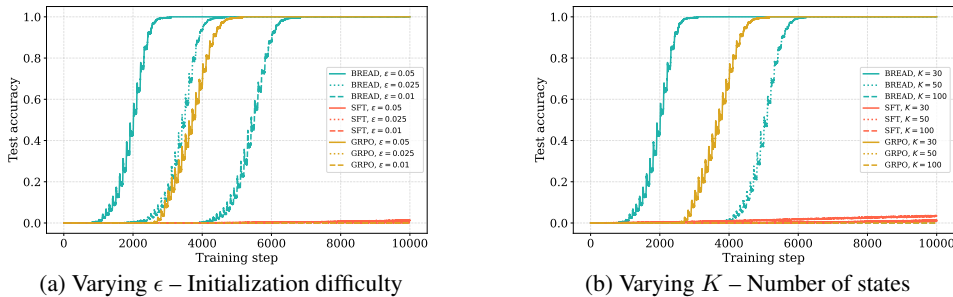

Figure 3: We compare SFT, GRPO, and BREAD according to the Navigation Task described in Section 3.1.  $K$  is number of states in the Markov chain whereas  $\epsilon$  is the probability of transition to *non-favorable* states. Our toy model reveals settings where BREAD can succeed while SFT or GRPO completely fail.

expert trace when it makes small jumps i.e.  $|\alpha_t - \alpha_{t+1}| \leq d$ . Additionally, consider a poor-quality initialization where, at any state  $i$ , the small model has tendency to bounce back and forth the State  $i$  and its *favorable* neighbor  $n(i)$  in the sense that all  $j \neq n(i)$  obeys  $\min\{\mathbb{P}(i \rightarrow j), \mathbb{P}(n(i) \rightarrow j)\} \leq \epsilon$  for some  $\epsilon > 0$ . Then, the initial model would achieve an exponentially-sparse reward proportional to  $\epsilon^{\Omega(K/d)}$  under mild conditions on the maximum trace length.

To proceed, we have experimented with the Navigation Task controlled by the parameters number of states  $K$ , small model’s jump capacity  $d$ , and initialization quality  $\epsilon$ . Figure 3 demonstrates how optimization of SFT and GRPO can suffer as a function of  $n$  and  $\epsilon$  respectively. Importantly, we also display the performance of BREAD which exhibits a much more favorable performance. The reader is referred to the supplementary material for full experimental details.

The BREAD is able to achieve sample efficiency by restricting the policy search to the unseen expert trace  $[\alpha_s, \alpha_{s+1}, \dots, \alpha_T = K]$ . In the extreme case of  $s = T - 1$ , BREAD only finds a path from  $\alpha_{T-1}$  to  $\alpha_T$  which has substantially denser reward with exponent moving from  $\Omega(\frac{K}{d})$  to  $\Omega(\frac{K}{Td})$  assuming  $|\alpha_t - \alpha_{t+1}| \propto K/T$ . When  $T \propto K$ , the overall training time of BREAD is expected to be polynomial in  $K$  rather than exponential. In words, BREAD facilitates efficiency by learning from expert’s reasoning one step at a time.

In the next section, we discuss how these insights are in line with the SFT and RL performance on real reasoning tasks with state-of-the-art models.

### 3.2 Empirical Insights into the Limitations of SFT and Reinforcement Learning for SLMs

**RL-only:** We begin by assessing how well RL works with SLMs in isolation. Experiments with vanilla GRPO [28], displayed in Figure 4, show that it merely sharpens the capabilities the model already exhibits. GRPO relies on sampling a mix of good and bad traces. But when a small base model fails to produce any high-quality trace—*nearly half of the queries* in our evaluations in Figure 4a—learning stalls due to lack of reward signals (Figure 4b). Related limitations are noted for RL with Verifiable Rewards of [36], which struggles to elicit fundamentally new reasoning patterns.

**SFT-only:** SFT can introduce new knowledge into the model. However, as discussed earlier, traces generated by much stronger models can be too complex for SLMs to learn resulting in poor initialization for RL. To demonstrate this, we start from Qwen2.5-1.5B-Instruct and Qwen2.5-3B-Instruct base models and fine-tune them with 1000 difficult questions, paired with reasoning traces generated by Gemini Thinking Experimental [8] and Deepseek-R1 [10], following [30]. These reasoning traces were previously shown to improve the reasoning capability of large models such as Qwen2.5-32B-Instruct and Qwen2.5-14B-Instruct by [19]. However, in our experiment results shown in Table 1, when SFT was performed on small models, *accuracy actually decreases*. For example, accuracy dropped from 0.257 to 0.177 on the GPQA dataset when the 1.5B parameter model was fine-tuned on S1K traces, and dropped even further to 0.121 when fine-tuned on the more verbose S1K-1.1 data. This corroborates our central intuition: when traces used for SFT exceed an SLM’s learning capacity, they can hurt the model performance rather than helping.

These findings—that for small models, RL alone, or SFT + RL, are insufficient—motivate BREAD which uses expert traces directly in the RL phase instead of relying on SFT to learn them first.

| Dataset   | Qwen-1.5B-Instruct |             |                 | Qwen-3B-Instruct |             |                 |
|-----------|--------------------|-------------|-----------------|------------------|-------------|-----------------|
|           | Base               | + SFT (S1K) | + SFT (S1K-1.1) | Base             | + SFT (S1K) | + SFT (S1K-1.1) |
| MATH [11] | 0.494              | 0.426       | 0.408           | 0.624            | 0.616       | 0.630           |
| GPQA [23] | 0.258              | 0.177       | 0.121           | 0.369            | 0.247       | 0.288           |

Table 1: Accuracy of small models can decrease after SFT. The base SLMs are Qwen2.5-1.5B-Instruct and Qwen2.5-3B-Instruct and the datasets used for SFT are S1K and S1K-1.1 [19], with responses generated by Gemini Flash Thinking API [9] and DeepSeek-R1 [10] respectively.

### 3.3 Why BREAD: Expert Traces Provide Critical Guidance and Curriculum for RL

While Section 3.2 shows that an SLM can struggle to imitate traces generated by powerful LLMs, we posit that *the SLM can still understand them well enough to extract useful information*, namely by using part of the complex traces as hints to lower the problem difficulty. To illustrate this, we define the “hint ratio” as the fraction of the expert trace used (in terms of number of episodes), as illustrated in Figure 5a. A higher hint ratio means more guidance for the model. In Figure 5b, we plot the model

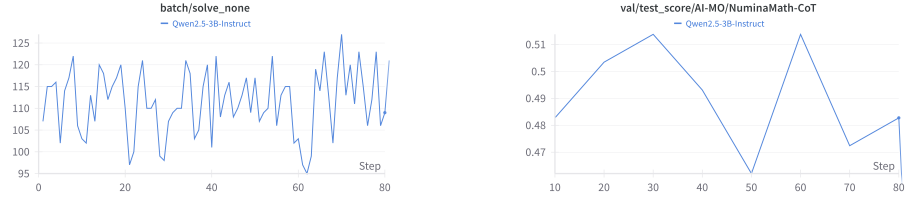

(a) Number of samples where all 8 rollouts fail

(b) Validation accuracy over training steps

Figure 4: Issues with vanilla GRPO on SLMs. Among 256 samples in a batch, for nearly half of them, the base model’s 8 rollouts produce no correct trace. The absence of reward inhibits further performance gains and validation accuracy stalls.

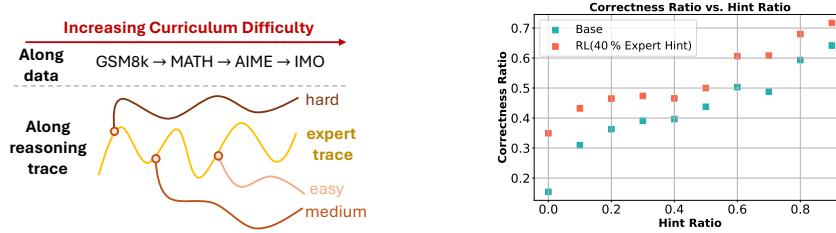

(a) Illustration of hint ratio (how much of the expert trace is provided) and curriculum learning.

(b) Accuracy for different ratio of hints, appended to the inference query.

Figure 5: (a) Math benchmarks may show difficulty tiers, but ranking individual problems for curriculum training is still challenging. Instead, BREAD can adaptively adjust the difficulty by automatically choosing the branching point. For easier questions, it would provide no or shorter hints (smaller hint ratio). (b) Model accuracy increases as longer hint is appended to the query. Dataset is the first 200 questions of NuminaMath-CoT. The blue dots are the base model (Qwen2.5-3B-Instruct), and the orange dots are RL finetuned using traces containing 40% hints.

accuracy for different hint ratios, where the hint is appended to the inference query. We can see that our intuition is correct: even providing part of the hint in a very simple way (by appending to the inference query) helps improve accuracy. In contrast, Figure 6 shows that SFT only on the same traces gets very limited improvement and can even hurt. BREAD is motivated by this observation and uses expert hints in a more sophisticated way, by integrating them directly into the RL create denser rewards.

We can also view BREAD through the lens of curriculum learning. As shown in Figure 5a, as we branch out from the expert trace earlier, solving the problem becomes more challenging. The Episode Anchor Search (EAS) step in BREAD automatically adjusts the branching point, producing a self-paced curriculum. In this sense, BREAD serves as a generalized curriculum-learning framework which (1) allows us to utilize SFT data within RL, (2) adapts the optimization to the problem difficulty, and (3) generates dense rewards by creating a curriculum along the reasoning trace. By branching along the expert trace at adaptive cut-points, BREAD automatically surfaces the most informative training samples and tunes their difficulty on the fly. This relieves us from hand-crafting a data-level schedule and lets the model discover its own curriculum.

A final surprising observation from Figure 5b is that conditioning RL training on questions with partial hints not only improves performance on hinted queries (e.g., orange dots with hint ratio 0.3 and above), but also improves accuracy on questions without any hints (i.e., orange dot with hint ratio of 0). This highlights the model’s ability to generalize from partial short traces to full long traces.

## 4 Experiments

**Baseline algorithms.** We evaluate the effectiveness of our method BREAD on mathematical tasks, which can be easily adapted to other reasoning tasks such as coding, commonsense reasoning, etc. We compare with the following baselines:

- GRPO: Standard GRPO.
- SFT: Standard supervised fine-tuning on the full training set. We denote SFT on various data splits as SFT(X), e.g. SFT(full) for the whole dataset, SFT(difficult) for the hardest subset, SFT(random) for a size-matched random subset, and SFT(selected) for the EAS-chosen subset. The precise discussion is detailed with the experiments results.

**Algorithm 1 BREAD:** GRPO with Branch Rollouts and Expert Anchors (see Algorithm 2 in Appendix for full version.)

---

**Require:** Dataset  $\mathcal{D}$ , current policy  $\pi_\theta$ , sampling number  $G$ , a list of keywords for splitting episodes  $[w_0, w_2, \dots, w_J]$

```

1: procedure BREAD( $\mathcal{D}, \pi_\theta, G, [w_0, w_2, \dots, w_J]$ )
2:   for step = 1, 2, ...,  $N$  do
3:     Sample a batch  $\mathcal{D}_b$  from  $\mathcal{D}$ 
4:     Update the old policy model  $\pi_{\text{old}} \leftarrow \pi_\theta$ 
5:     for each question and expert solution pair  $(Q, S)$  in  $\mathcal{D}_b$  do
6:        $[R_1, R_2, \dots, R_G], \rho \leftarrow \text{EAS}(Q, S, \pi_\theta, G, [w_0, w_2, \dots, w_J])$   $\triangleright$  Episode Anchor Search (EAS)
7:       Add the  $(Q, \rho), R_i$  to the buffer.
8:     end for
9:     for each  $(Q, \rho), o_i$  in the buffer, compute  $\hat{A}_{i,t}$  for the  $t$ -th token of  $o_i$   $\triangleright$  Equation (2)
10:   end for
11:   for iteration = 1, 2, ...,  $T$  do
12:     Update the policy model  $\pi_\theta$  by maximizing the BREAD objective  $\triangleright$  Equation (1)
13:   end for
14:   return  $\pi_\theta$ 
15: end procedure
16: procedure EAS( $Q, S, \pi, G, [w_0, w_2, \dots, w_J]$ )
17:    $[R_1, R_2, \dots, R_G] \leftarrow \pi(Q)$   $\triangleright$  Sample  $I$  responses for question  $Q$  with current policy  $\pi$ 
18:    $p_{\text{correct}} \leftarrow \text{compute\_correct\_probability}([R_1, R_2, \dots, R_G], S)$ 
19:    $\triangleright$  compute correct probability based on responses and the gold solution
20:   if  $0 < p_{\text{correct}}$  then
21:     return  $[R_1, R_2, \dots, R_G], NA$ 
22:   else
23:      $[e_0, e_1, \dots, e_K] \leftarrow \text{split\_episodes}(S, [w_0, w_2, \dots, w_J])$ 
24:     return BINARY_SEARCH_AND_GENERATE( $Q, S, \pi, G, [e_1, e_2, \dots, e_K], 0, K$ )
25:   end if
26: end procedure

```

---

- SFT + GRPO: This means SFT is run followed by GRPO. In other words, GRPO continues from the final checkpoint of the same SFT run. We denote GRPO fine-tuning initialized from an SFT model trained on data split  $X$  as SFT( $X$ ) + GRPO.
- GRPO w/ Expert Trace: During GRPO training, the entire expert trace is injected as an additional rollout for all queries. This is a strong baseline as it contains the expert. Details in Appendix C.

**Training settings.** We adopt the verl framework [29] for training. We utilize the Adam optimizer [15] with a constant learning rate of  $1 \times 10^{-6}$ . For rollout, the prompt batch size is 256 and we sample 8 responses for each prompt. For training, the mini-batch size is 64. To find the appropriate branching point during the Episode Anchor Search (EAS) step of BREAD (Section 3), we first split the expert trace into sentences (on easier datasets like MATH [11], where the expert traces are generally short) or into paragraphs (on harder datasets like NuminaMth-CoT [16] and OpenR1-Math-220K [7]). Then, we aggregate the split partitions into  $K = 10$  episodes evenly, and proceed with binary search. See details in Appendix B.3.

## 4.1 Main Results

**BREAD outperforms all baselines in terms of test accuracy.** Figure 6 plots the training curves of all methods on the NuminaMath-CoT benchmark, starting from the Qwen-2.5-3B-Instruct base model. In Figure 6a, we visualize the test accuracy against training steps for BREAD and the baseline methods. BREAD outperforms all the baselines. Let us discuss each baseline in turn. BREAD improves final accuracy by more than 15% over vanilla GRPO. SFT can offer a stronger starting point for RL, which we can see by comparing the SFT and SFT+GRPO curves, but BREAD is still better. (Note that training SFT for more iterations does not further improve performance, see Appendix B.1.) SFT(Difficult) represents SFT trained on the hardest questions from NuminaMath-CoT, obtained by sorting samples by solution length. Intuitively, problems that require longer solutions are typically more complex and involve more reasoning steps. Comparing the SFT(Difficult) and SFT(Difficult)+GRPO curves, we can see that SFT with too complex expert traces can even hurt the performance of SLM, which further hurts the later GRPO stage. Finally, from the GRPO w/ Expert trace curve, we see that adding the expert trace as an extra rollout during GRPO mitigates

sparse rewards and shows noticeable performance improvement, but it is still worse than BREAD. We suspect this is because there is a distribution gap between small and large model’s reasoning traces, which makes SLM imitation of large models hard, while BREAD can reduce the gap during learning by letting the SLM figure out the reasoning steps by itself more. See further discussion below on “hard questions” for elaboration. We also provide more results among different base models and datasets in Table 2 and Appendix B.

**BREAD reduces training time.** BREAD is also markedly more training-efficient. It can reach the accuracy of the best baseline, SFT+GRPO, in just 25% of the training steps (Figure 6a), translating to roughly a 75% reduction in total compute FLOPs (Figure 6b). We estimated the FLOPs based on the common cost evaluation method used in recent scaling-law studies [30, 12, 25], by counting a forward pass as  $2ND$  and a backward pass as  $4ND$ . Here  $N$  is the number of model parameters and  $D$  is the total token count processed in that pass. For calculation details, see Appendix A.1. Note that we estimate  $D$  as the average length of all expert traces in the training set, but according to our measurements, BREAD’s actual generation length is always shorter. Therefore for BREAD, its actual token count, and thus its FLOP cost, is even lower than the estimated values reported Figure 6b. We also discuss the potential of reducing the number of rollout needed to reduce training cost in Appendix B.2.

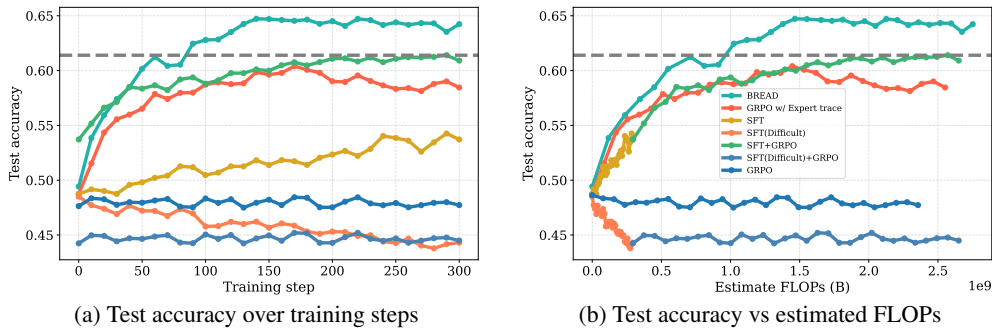

Figure 6: Test accuracy over training steps (left) / FLOPs (right). BREAD, which adaptively uses hints from expert traces during GRPO, significantly improves SLM reasoning ability compared to all baselines. The gray dashed line (max accuracy of the best baseline) demonstrates that BREAD can speed up the convergence speed by about  $3\times$ . Both figures share the same legend.

**BREAD succeeds on the hard questions, where other baselines fail.** To understand the gains of BREAD, we train and evaluate each method exclusively on very difficult problems. The goal is to investigate whether expert hints in BREAD can help SLMs learn new information particularly from these hard questions. We conduct the experiment on the NuminaMath-CoT dataset and the Qwen2.5-3B-Instruct as the base model. To build the hard dataset, we first run ordinary SFT and from the training dataset, we select the 500 questions for which three independent generations produce no correct trace (pass@3 = 0). These tasks are unsolved by the small model, and their expert traces proved too complex for SFT to learn. The 500 samples were split into 80/20 train/test subsets. We then again used Qwen2.5-3B-Instruct as the base model and trained each method on this hard subset. The results are shown in Figure 7a. All baselines show little or no improvement on the test set after training on the hard questions. In contrast, BREAD achieves a clear upward performance with continued training, demonstrating that its partial expert guidance and branched rollout strategy can provide learnable information, even when standard SFT and vanilla GRPO fail. We argue that BREAD succeeds because it adaptively reduce problem difficulty and densifies the rewards. As shown in Figure 7b, BREAD sharply lowers the solve-none ratio, getting more informative samples and richer feedback. This enables BREAD to learn effectively even from very hard questions and complex reasoning traces.

**BREAD improves sample efficiency during training.** SLMs distilled via large-scale SFT can achieve strong reasoning capability, such as DeepSeek-R1-Distill [10]. However, the distillation pipeline is prohibitively expensive. For example, this model is trained with 800k samples from both reasoning and non-reasoning domains curated with DeepSeek-R1, containing 671 billion parameters. A single forward pass through such a huge model already costs more FLOPs than 25 RL training steps with 8 rollouts. The pipeline also needs expensive sample filtering and trace post-processing,

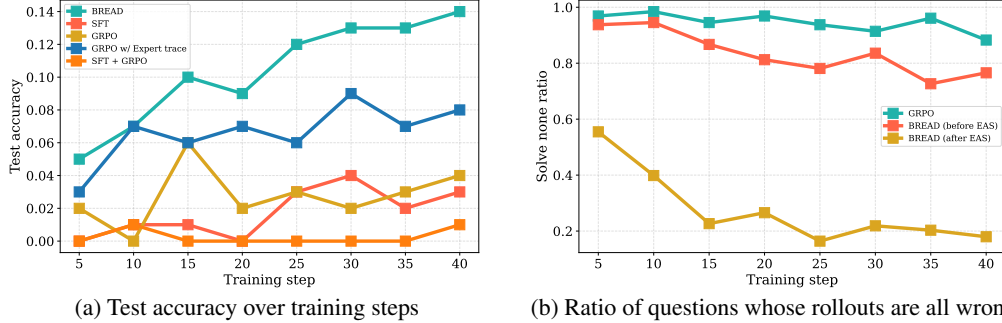

Figure 7: (a) Test accuracy over training steps. BREAD outperforms other baselines significantly while the traditional methods (SFT, GRPO, SFT+GRPO) learn little. (b) Proportion of test questions for which every rollout fails (solve-none ratio). In vanilla GRPO, the ratio stays persistently high, signalling that training stalls under sparse rewards. In BREAD, the solve-none ratio for regular rollout starts similarly high, but EAS injects expert traces and densifies the reward. This rate continuously decreases, confirming that the model is learning.

like the heavyweight data-collection procedure in [19, 17]. What makes things worse is that, as illustrated in Table 1, each target model requires training with different samples, multiplying the cost.

In contrast, BREAD is far more sample-efficient, achieving comparable gains with a small fraction of the expert trace and without any heavyweight sample selection stage. To show this, we created two trace-budget-matched baselines, SFT(selected) and SFT(random). For fair comparison, we first record the expert traces actually requested by BREAD via Episode Anchor Search (EAS). On NuminaMath-CoT, this corresponded to 36.7% of samples, and on the easier Math [11] dataset the fraction falls to 19.1% (during 300 training steps of Qwen-2.5-3B-Instruct). We then supervised fine-tune base models with the same number of traces. To create SFT(selected), we select the exact subset chosen by BREAD. To create SFT(random), we use an equally sized randomly picked subset. Finally, we created SFT(full), which uses all the expert traces, take a high cost. Each of the SFT(x) phases was followed by a GRPO phase. As the results in Table 2 show, BREAD outperforms nearly all the SFT(X)+GRPO baselines in terms of accuracy, and can even approach the performance of the expensive DeepSeek-R1-Distill model. Notably, while DeepSeek-R1-Distill gains from vast and diverse training data, BREAD achieves nearly comparable accuracy without requiring this data. We also observe that small models do not necessarily benefit from SFT with expert traces, as evidenced by the Qwen-2.5-1.5B-Instruct run on NuminaMath-CoT, where SFT(full)+GRPO has relatively low accuracy. Also, which samples are most useful for SFT is uncertain: on the MATH dataset, SFT(selected)+GRPO has higher accuracy than SFT(random)+GRPO with Qwen-3B-Instruct, but it is the opposite for Qwen-1.5B-Instruct.

| Model              | Dataset        | GRPO  | SFT(full)+GRPO | SFT(random)+GRPO | SFT(selected)+GRPO | BREAD | DeepSeek-Distill |
|--------------------|----------------|-------|----------------|------------------|--------------------|-------|------------------|
| Qwen-1.5B-Instruct | MATH           | 0.590 | 0.774          | 0.712            | 0.706              | 0.788 | 0.818            |
| Qwen-3B-Instruct   | MATH           | 0.681 | 0.846          | 0.735            | 0.794              | 0.843 | /                |
| Qwen-1.5B-Instruct | NuminaMath-CoT | 0.347 | 0.242          | 0.356            | 0.234              | 0.361 | 0.368            |
| Qwen-3B-Instruct   | NuminaMath-CoT | 0.475 | 0.537          | 0.519            | 0.502              | 0.647 | /                |

Table 2: BREAD outperforms other baselines and nearly reaches the accuracy of DeepSeek-R1-Distill, which has the benefit of vast training data. There is no DeepSeek-R1-Distill for Qwen-3B provided by [10], so its cells are left blank.

## 5 Discussion and Limitations

Our work introduces BREAD as a principled algorithm to densify the reward signal using branch rollouts from the expert trace. BREAD significantly enhances sample complexity, training time, and eventual accuracy over employing GRPO. It is also theoretically well motivated and allows the model to overcome fundamental bottlenecks of SFT+GRPO. BREAD has also a few limitations: Firstly, we focus on SLMs and assume that there is a strong expert/teacher model to provide high-quality traces. Secondly, it is possible that SLM may fail to obtain a reward signal even from partial traces of the teacher-imagine the student model can’t conclude even if the full proof is presented. We leave these as future directions.

**Broader impact:** Enhancing the capabilities of small language models can have environmental benefits by improving AI efficiency. We do not anticipate negative societal impacts.

## References

- [1] Marah Abdin, Jyoti Aneja, Harkirat Behl, Sébastien Bubeck, Ronen Eldan, Suriya Gunasekar, Michael Harrison, Russell J Hewett, Mojan Javaheripi, Piero Kauffmann, et al. Phi-4 technical report. *arXiv preprint arXiv:2412.08905*, 2024.
- [2] Pranjal Aggarwal and Sean Welleck. L1: Controlling how long a reasoning model thinks with reinforcement learning. *arXiv preprint arXiv:2503.04697*, 2025.
- [3] Marcin Andrychowicz, Filip Wolski, Alex Ray, Jonas Schneider, Rachel Fong, Peter Welinder, Bob McGrew, Josh Tobin, OpenAI Pieter Abbeel, and Wojciech Zaremba. Hindsight experience replay. *Advances in neural information processing systems*, 30, 2017.
- [4] Thomas Anthony, Zheng Tian, and David Barber. Thinking fast and slow with deep learning and tree search. *Advances in neural information processing systems*, 30, 2017.
- [5] Tianzhe Chu, Yuexiang Zhai, Jihan Yang, Shengbang Tong, Saining Xie, Dale Schuurmans, Quoc V Le, Sergey Levine, and Yi Ma. Sft memorizes, rl generalizes: A comparative study of foundation model post-training. *arXiv preprint arXiv:2501.17161*, 2025.
- [6] Adrien Ecoffet, Joost Huizinga, Joel Lehman, Kenneth O Stanley, and Jeff Clune. First return, then explore. *Nature*, 590(7847):580–586, 2021.
- [7] Hugging Face. Open r1: A fully open reproduction of deepseek-r1, January 2025.
- [8] Google. Gemini 2.0 flash thinking mode (gemini-2.0f-lash-thinking-exp-1219), 2024. <https://cloud.google.com/vertex-ai/generative-ai/docs/thinking>.
- [9] Google. Gemini 2.0 flash thinking mode (gemini-2.0-flash-thinking-exp-1219), December 2024. Accessed 15 May 2025. “Last updated 14 May 2025” on the page.
- [10] Daya Guo, Dejian Yang, Haowei Zhang, Junxiao Song, Ruoyu Zhang, Runxin Xu, Qihao Zhu, Shitong Ma, Peiyi Wang, Xiao Bi, et al. Deepseek-r1: Incentivizing reasoning capability in llms via reinforcement learning. *arXiv preprint arXiv:2501.12948*, 2025.
- [11] Dan Hendrycks, Collin Burns, Saurav Kadavath, Akul Arora, Steven Basart, Eric Tang, Dawn Song, and Jacob Steinhardt. Measuring mathematical problem solving with the math dataset. *arXiv preprint arXiv:2103.03874*, 2021.
- [12] Jordan Hoffmann, Sebastian Borgeaud, Arthur Mensch, Elena Buchatskaya, Trevor Cai, Eliza Rutherford, Diego de Las Casas, Lisa Anne Hendricks, Johannes Welbl, Aidan Clark, et al. Training compute-optimal large language models. *arXiv preprint arXiv:2203.15556*, 2022.
- [13] Aaron Jaech, Adam Kalai, Adam Lerer, Adam Richardson, Ahmed El-Kishky, Aiden Low, Alec Helyar, Aleksander Madry, Alex Beutel, Alex Carney, et al. Openai o1 system card. *arXiv preprint arXiv:2412.16720*, 2024.
- [14] Koray Kavukcuoglu. Gemini 2.5: Our most intelligent ai model. <https://blog.google/technology/google-deepmind/gemini-model-thinking-updates-march-2025/>, March 2025. Accessed 15 May 2025.
- [15] Diederik P Kingma. Adam: A method for stochastic optimization. *arXiv preprint arXiv:1412.6980*, 2014.
- [16] Jia LI, Edward Beeching, Lewis Tunstall, Ben Lipkin, Roman Soletskyi, Shengyi Costa Huang, Kashif Rasul, Longhui Yu, Albert Jiang, Ziju Shen, Zihan Qin, Bin Dong, Li Zhou, Yann Fleureau, Guillaume Lample, and Stanislas Polu. NuminaMath. [<https://huggingface.co/AI-MO/NuminaMath-CoT>] ([https://github.com/project-numina/aimo-progress-prize/blob/main/report/numina\\_dataset.pdf](https://github.com/project-numina/aimo-progress-prize/blob/main/report/numina_dataset.pdf)), 2024.
- [17] Yuetai Li, Xiang Yue, Zhangchen Xu, Fengqing Jiang, Luyao Niu, Bill Yuchen Lin, Bhaskar Ramasubramanian, and Radha Poovendran. Small models struggle to learn from strong reasoners. *arXiv preprint arXiv:2502.12143*, 2025.

- [18] Zhihang Lin, Mingbao Lin, Yuan Xie, and Rongrong Ji. Cppo: Accelerating the training of group relative policy optimization-based reasoning models. *arXiv preprint arXiv:2503.22342*, 2025.
- [19] Niklas Muennighoff, Zitong Yang, Weijia Shi, Xiang Lisa Li, Li Fei-Fei, Hannaneh Hajishirzi, Luke Zettlemoyer, Percy Liang, Emmanuel Candès, and Tatsunori Hashimoto. s1: Simple test-time scaling. *arXiv preprint arXiv:2501.19393*, 2025.
- [20] Andrew Y Ng, Daishi Harada, and Stuart Russell. Policy invariance under reward transformations: Theory and application to reward shaping. In *Icml*, volume 99, pages 278–287. Citeseer, 1999.
- [21] Yuxiao Qu, Matthew YR Yang, Amrith Setlur, Lewis Tunstall, Edward Emanuel Beeching, Ruslan Salakhutdinov, and Aviral Kumar. Optimizing test-time compute via meta reinforcement fine-tuning. *arXiv preprint arXiv:2503.07572*, 2025.
- [22] Rafael Rafailov, Archit Sharma, Eric Mitchell, Christopher D Manning, Stefano Ermon, and Chelsea Finn. Direct preference optimization: Your language model is secretly a reward model. *Advances in Neural Information Processing Systems*, 36:53728–53741, 2023.
- [23] David Rein, Betty Li Hou, Asa Cooper Stickland, Jackson Petty, Richard Yuanzhe Pang, Julien Dirani, Julian Michael, and Samuel R Bowman. Gpqa: A graduate-level google-proof q&a benchmark. In *First Conference on Language Modeling*, 2024.
- [24] Stéphane Ross, Geoffrey Gordon, and Drew Bagnell. A reduction of imitation learning and structured prediction to no-regret online learning. In *Proceedings of the fourteenth international conference on artificial intelligence and statistics*, pages 627–635. JMLR Workshop and Conference Proceedings, 2011.
- [25] Nikhil Sardana, Jacob Portes, Sasha Dobov, and Jonathan Frankle. Beyond chinchilla-optimal: Accounting for inference in language model scaling laws. *arXiv preprint arXiv:2401.00448*, 2023.
- [26] Nikunj Saunshi, Nishanth Dikkala, Zhiyuan Li, Sanjiv Kumar, and Sashank J Reddi. Reasoning with latent thoughts: On the power of looped transformers. *arXiv preprint arXiv:2502.17416*, 2025.
- [27] Simon Schmitt, Jonathan J Hudson, Augustin Zidek, Simon Osindero, Carl Doersch, Wojciech M Czarnecki, Joel Z Leibo, Heinrich Kuttler, Andrew Zisserman, Karen Simonyan, et al. Kickstarting deep reinforcement learning. *arXiv preprint arXiv:1803.03835*, 2018.
- [28] Zhihong Shao, Peiyi Wang, Qihao Zhu, Runxin Xu, Junxiao Song, Xiao Bi, Haowei Zhang, Mingchuan Zhang, YK Li, Y Wu, et al. Deepseekmath: Pushing the limits of mathematical reasoning in open language models. *arXiv preprint arXiv:2402.03300*, 2024.
- [29] Guangming Sheng, Chi Zhang, Zilingfeng Ye, Xibin Wu, Wang Zhang, Ru Zhang, Yanghua Peng, Haibin Lin, and Chuan Wu. Hybridflow: A flexible and efficient rlhf framework. *arXiv preprint arXiv: 2409.19256*, 2024.
- [30] Charlie Snell, Jaehoon Lee, Kelvin Xu, and Aviral Kumar. Scaling llm test-time compute optimally can be more effective than scaling model parameters. *arXiv preprint arXiv:2408.03314*, 2024.
- [31] Kimi Team, Angang Du, Bofei Gao, Bowei Xing, Changjiu Jiang, Cheng Chen, Cheng Li, Chenjun Xiao, Chenzhuang Du, Chonghua Liao, et al. Kimi k1. 5: Scaling reinforcement learning with llms. *arXiv preprint arXiv:2501.12599*, 2025.
- [32] Mel Vecerik, Todd Hester, Jonathan Scholz, Fumin Wang, Olivier Pietquin, Bilal Piot, Nicolas Heess, Thomas Rothörl, Thomas Lampe, and Martin Riedmiller. Leveraging demonstrations for deep reinforcement learning on robotics problems with sparse rewards. *arXiv preprint arXiv:1707.08817*, 2017.

- 403 [33] Zhenting Wang, Guofeng Cui, Kun Wan, and Wentian Zhao. Dump: Automated distribution-  
404 level curriculum learning for rl-based llm post-training. *arXiv preprint arXiv:2504.09710*,  
405 2025.
- 406 [34] Yixuan Even Xu, Yash Savani, Fei Fang, and Zico Kolter. Not all rollouts are useful: Down-  
407 sampling rollouts in llm reinforcement learning. *arXiv preprint arXiv:2504.13818*, 2025.
- 408 [35] Qiying Yu, Zheng Zhang, Ruofei Zhu, Yufeng Yuan, Xiaochen Zuo, Yu Yue, Tiantian Fan,  
409 Gaohong Liu, Lingjun Liu, Xin Liu, et al. Dapo: An open-source llm reinforcement learning  
410 system at scale. *arXiv preprint arXiv:2503.14476*, 2025.
- 411 [36] Yang Yue, Zhiqi Chen, Rui Lu, Andrew Zhao, Zhaokai Wang, Shiji Song, and Gao Huang. Does  
412 reinforcement learning really incentivize reasoning capacity in llms beyond the base model?  
413 *arXiv preprint arXiv:2504.13837*, 2025.
- 414 [37] Xuechen Zhang, Zijian Huang, Chenchun Ni, Ziyang Xiong, Jiasi Chen, and Samet Oymak.  
415 Making small language models efficient reasoners: Intervention, supervision, reinforcement.  
416 *arXiv preprint arXiv:2505.07961*, 2025.

417 **The Supplementary Material is organized as follows:**

- 418 • In Appendix A, we explain the calculation of estimated FLOPs (Appendix A.1) and addi-  
419 tional details about the training and evaluation of BREAD (Appendix A.2).
- 420 • In Appendix B, we show that SFT further cannot improve the performance of models  
421 (Appendix B.1), BREAD can reduce the number of rollouts required during the sampling  
422 stage in training (Appendix B.2), and the distribution of the step number of expert solutions  
423 (Appendix B.3).
- 424 • In Appendix C, we explain the baseline GRPO w/ Expert Trace in detail and compare it  
425 to RL with an SFT loss.
- 426 • In Appendix D, we present a detailed formulation of the Markov model introduced in  
427 Section 3.1, and provide concise proof of related theorems.

---

**Algorithm 2 BREAD:** GRPO with Branch Rollouts and Expert Anchors (full version)

---

**Require:** Dataset  $\mathcal{D}$ , current policy  $\pi_\theta$ , sampling number  $G$ , a list of keywords for splitting episodes  $[w_0, w_2, \dots, w_J]$

```

1: procedure BREAD( $\mathcal{D}, \pi_\theta, G, [w_0, w_2, \dots, w_J]$ )
2:   for step = 1, 2, ...,  $N$  do
3:     Sample a batch  $\mathcal{D}_b$  from  $\mathcal{D}$ 
4:     Update the old policy model  $\pi_{\text{old}} \leftarrow \pi_\theta$ 
5:     for each question and expert solution pair  $(Q, S)$  in  $\mathcal{D}_b$  do
6:        $[R_1, R_2, \dots, R_G], \rho \leftarrow \text{EAS}(Q, S, \pi_\theta, G, [w_0, w_2, \dots, w_J]) \triangleright$  Episode Anchor Search (EAS)
7:       Add the  $(Q, \rho), R_i$  to the buffer.
8:     end for
9:     For each  $(Q, \rho), o_i$  in the buffer, compute  $\hat{A}_{i,t}$  for the  $t$ -th token of  $o_i$   $\triangleright$  Equation (2)
10:  end for
11:  for iteration = 1, 2, ...,  $T$  do
12:    Update the policy model  $\pi_\theta$  by maximizing the BREAD objective  $\triangleright$  Equation (1)
13:  end for
14:  return  $\pi_\theta$ 
15: end procedure
16: procedure EAS( $Q, S, \pi, G, [w_0, w_2, \dots, w_J]$ )
17:   $[R_1, R_2, \dots, R_G] \leftarrow \pi(Q) \triangleright$  Sample  $I$  responses for question  $Q$  with current policy  $\pi$ 
18:   $p_{\text{correct}} \leftarrow \text{compute\_correct\_probability}([R_1, R_2, \dots, R_G], S)$ 
19:   $\triangleright$  compute correct probability based on responses and the gold solution
20:  if  $0 < p_{\text{correct}}$  then
21:    return  $[R_1, R_2, \dots, R_G], NA$ 
22:  else
23:     $[e_0, e_1, \dots, e_K] \leftarrow \text{split\_episodes}(S, [w_0, w_2, \dots, w_J])$ 
24:    return BINARY_SEARCH_AND_GENERATE( $Q, S, \pi, G, [e_1, e_2, \dots, e_K], 0, K$ )
25:  end if
26: end procedure
27: procedure BINARY_SEARCH_AND_GENERATE( $Q, S, \pi, G, [e_1, e_2, \dots, e_K], L, R$ )
28:   $M = \frac{L+R}{2}$ 
29:   $[R_1, R_2, \dots, R_G] \leftarrow \pi([Q, e_1, e_2, \dots, e_M])$ 
30:   $p_{\text{correct}} \leftarrow \text{compute\_correct\_probability}([R_1, R_2, \dots, R_G], S)$ 
31:  if  $0 < p_{\text{correct}} < 1$  then
32:    return  $[R_1, R_2, \dots, R_G], S_{1:M}$ 
33:  else if  $p_{\text{correct}} = 0$  then
34:     $L = M, R = R, M = \frac{L+R}{2}$ 
35:    return binary_search_and_generate( $Q, S, \pi, G, [e_1, e_2, \dots, e_K], L, R$ )
36:  else
37:     $L = L, R = M, M = \frac{L+R}{2}$ 
38:    return binary_search_and_generate( $Q, S, \pi, G, [e_1, e_2, \dots, e_K], L, R$ )
39:  end if
40: end procedure

```

---

## A Experiment details

### A.1 FLOPs

We compute the estimate FLOPs following [30, 12, 25]. The supervised finetuning, which include one forward and one backward phase, people use a common approximation  $6ND$  [12], and for inference, which include only one forward phase, people always use  $2ND$  [25]. Here  $N$  represents model parameters,  $D$  is the total token count processed in that pass. So a forward phase takes  $2ND$  while a backward phase take  $4ND$ . For estimation, we define the average length of a single question in one inference time as  $D_{\text{sample}}$ , so  $D = D_{\text{sample}} \times n_{\text{rollout}}$  for RL and  $D = D_{\text{sample}}$  for SFT. For estimation, we define the average length of a single question in one inference time as  $D_{\text{sample}}$ , so  $D = D_{\text{sample}} \times n_{\text{rollout}}$  for RL and  $D = D_{\text{sample}}$  for SFT. GRPO with eight rollouts,  $n_{\text{rollout}} = 8$  including eight forward and eight backward phase needs  $6 \times 8 \times ND_{\text{rollout}}$ . BREAD will take more forward pass to do the binary search, so we use  $6 * 8 * ND_{\text{rollout}} + 4ND_{\text{additional}}$ . GRPO w/ Expert trace includes including eight forward and nine backward phase, so we use  $6 \times 8 \times ND_{\text{rollout}} + 4 \times ND_{\text{rollout}}$ . We estimate  $D$  with the average length of all expert trace in the training dataset. We truly record the additional number of generation  $D_{\text{additional}} = D_{\text{rollout}} \times n_{\text{additional\_rollout}}$ . Notably, the generation length of BREAD is always shorter than expert trace and vanilla GRPO. So our BREAD can reduce even more computation resource compare to 75% shown in Figure 6b.

### A.2 Experiment Setting Details for BREAD

In addition to Section 4, we list additional details of our experiments here. During training, we set `max_prompt_length = 2048` for MATH experiments and `max_prompt_length = 4096` for NuminaMath-CoT experiments. For both training and evaluation, we set `max_response_length = 4096` for MATH experiments and `max_response_length = 8192` for NuminaMath-CoT experiments. During training, we set the number of rollouts as 8. We used a low-variance KL divergence and set the coefficient for KL divergence as 0.001. We set the temperature at 0.6 for both training and evaluation.

For the implementation details of the episode splitting for the expert trace during training, we split the expert trace with sentences separated by “.” or “\n” for MATH and paragraphs separated by “\n\n” for NuminaMath-CoT. Note that the expert traces can be either human provided solutions or correct solutions provided by larger expert models, and the splitting method here can also be changed to split according to a specific keyword list. After splitting, we aggregate the traces into 10 episodes evenly for all expert traces. The reason why we implement this way is that we want to make sure that the number of episodes of the expert traces is not too large, which can guarantee that the EAS step does not take too much time.

During training, assume we have a question  $Q$  and an expert hint  $\rho$  (or without  $\rho$  during inference), the template of the prompt is as follows:

```
{‘content’: ‘<|im_start|>system\nYou are a helpful assistant. You
first thinks about the reasoning process in the mind and then provides
the user with the answer.<|im_end|>\n<|im_start|>user\n{Q,\rho} Show your
work in <think> <think> tags. And return the final answer within
\\boxed{<|im_end|>\n<|im_start|>assistant\nLet me solve this step by
step.\n<think>’, ‘role’: ‘user’}
```

For the hardware requirements, all of experiments are done with 8 L40S 40GB GPUs except the training starting from Qwen2.5-3B-Instruct as the base model, which requires 8 80G H100 GPUs.

## B Additional Experiments

### B.1 SFT training saturates and does not help after a while

Supplement to Figure 6a. As shown in Figure 8, training SFT for more iterations does not further improve test accuracy. In other words, we already use the model that SFT can achieve. For a fair comparison, we therefore use the 300-step checkpoint as the starting point for SFT+GRPO.

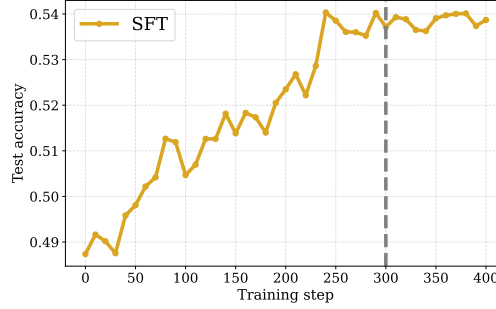

Figure 8: Test accuracy of SFT over training steps. The accuracy doesn’t continuously increase after the number of training step we use.

## 476 B.2 BREAD can reduce the number of rollouts needed

477 Another straightforward way to reduce training cost is to reduce the number of rollouts, since FLOPs  
 478 scale linearly with that count. However, for vanilla GRPO, fewer rollouts lead to lower accuracy,  
 479 whereas BREAD maintains its performance even as the number of rollouts decreases. The result is  
 480 shown in Figure 9. As we have shown in the main body, when the task is so difficult that the base  
 481 policy rarely produces correct traces, vanilla GRPO fails. To study rollout efficiency under conditions  
 482 where GRPO can learn, we moved to the MATH dataset with a Qwen-2.5-3B-Instruct base model.  
 483 With eight rollouts, GRPO does increase accuracy. However, performance will decrease if the rollout  
 484 budget is reduced from 8 to 5. In contrast, BREAD reaches the same accuracy with just five rollouts,  
 cutting training FLOPs while preserving performance.

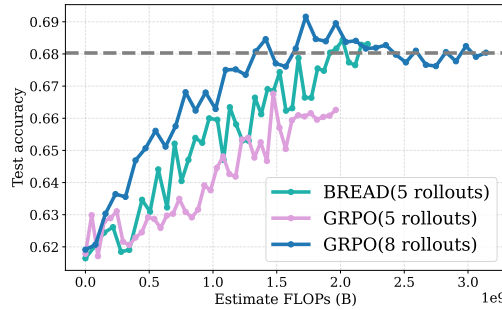

Figure 9: Test accuracy over training steps with different number of rollouts. The gray dashed line shows the final accuracy of vanilla GRPO with 8 rollouts. The total training step is 500.

485

## 486 B.3 Episode details

487 As described in Appendix A.2, we plot the distribution of the number of steps for our two datasets  
 488 before episode aggregation. As shown in Figure 10, we can see that that most expert traces contain  
 489 less than 20 steps, while few of them contain much more steps, which may slow down the training sif  
 490 there ised if there is no episode aggregation.

## 491 C GRPO w/ Expert Trace Details and its Connection with RL with SFT Loss

492 The baseline GRPO w/ Expert Trace (GRPO-ET) generally follows the same procedure as the  
 493 standard GRPO. Instead, it enforces one of the  $G$  rollouts as the expert trace. Therefore, the objective

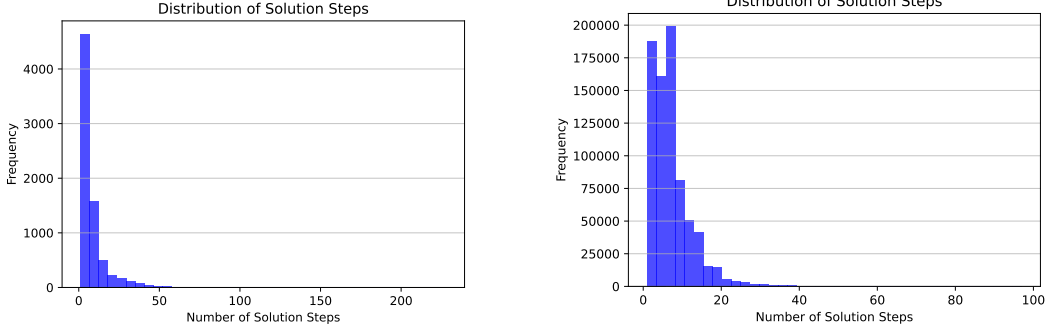

(a) Distribution plot of MATH solution step numbers.

(b) Distribution plot of NuminaMath-CoT solution step numbers.

Figure 10: Distribution plot of MATH and NuminaMath-CoT solution step numbers

function is

$$\begin{aligned} \mathcal{J}_{\text{GRPO-ET}}(\theta) = & \mathbb{E}_{(q, S, a) \sim \mathcal{D}, \{o_i\}_{i=1}^{G-1} \sim \pi_{\text{old}}(\cdot|q)} \\ & \left[ \frac{1}{G} \left( \sum_{i=1}^{G-1} \frac{1}{|o_i|} \sum_{t=1}^{|o_i|} \left( \min(r_{i,t}(\theta) \hat{A}_{i,t}, \text{clip}(r_{i,t}(\theta), 1 - \varepsilon, 1 + \varepsilon) \hat{A}_{i,t}) - \beta D_{\text{KL}}(\pi_{\theta} || \pi_{\text{ref}}) \right) \right) \right] \\ & + \frac{1}{G|o_S|} \sum_{t=1}^{|o_S|} \left( \min(r_{i,t}(\theta) \hat{A}_{S,t}, \text{clip}(r_{i,t}(\theta), 1 - \varepsilon, 1 + \varepsilon) \hat{A}_{S,t}) - \beta D_{\text{KL}}(\pi_{\theta} || \pi_{\text{ref}}) \right) \end{aligned} \quad (3)$$

where

$$r_{i,t}(\theta) = \frac{\pi_{\theta}(o_{i,t}|q, o_{i < t})}{\pi_{\text{old}}(o_{i,t}|q, o_{i < t})}, \quad \hat{A}_{i,t} = \frac{R_i - \text{mean}(\{R_i\}_{i=1}^{G-1}, R_S)}{\text{std}(\{R_i\}_{i=1}^{G-1}, R_S)}, \quad \hat{A}_{S,t} = \frac{R_S - \text{mean}(\{R_i\}_{i=1}^{G-1}, R_S)}{\text{std}(\{R_i\}_{i=1}^{G-1}, R_S)} \quad (4)$$

All notations in Equations (3) and (4) are the same as [10], while  $S$  represents the expert trace, and all variables whose subscript contains  $S$  represent the corresponding variables.

Here, we can see a clear connection between GRPO w/ Expert Trace and GRPO (rollout number is  $G - 1$ ) with an SFT loss. Suppose that we want to deploy GRPO while adding the SFT entropy loss to the standard GRPO loss, the objective function is

$$\begin{aligned} \mathcal{J}_{\text{GRPO\_SFT}} = & \mathbb{E}_{(q, S, a) \sim \mathcal{D}, \{o_i\}_{i=1}^{G-1} \sim \pi_{\text{old}}(\cdot|q)} \\ & \left[ \frac{1}{G} \left( \sum_{i=1}^{G-1} \frac{1}{|o_i|} \sum_{t=1}^{|o_i|} \left( \min(r_{i,t}(\theta) \hat{A}_{i,t}, \text{clip}(r_{i,t}(\theta), 1 - \varepsilon, 1 + \varepsilon) \hat{A}_{i,t}) - \beta D_{\text{KL}}(\pi_{\theta} || \pi_{\text{ref}}) \right) \right) \right] \\ & + \sum_{t=1}^{|o_S|} \log \pi_{\theta}(S_t | q, S_{< t}) \end{aligned} \quad (5)$$

where

$$r_{i,t}(\theta) = \frac{\pi_{\theta}(o_{i,t}|q, o_{i < t})}{\pi_{\text{old}}(o_{i,t}|q, o_{i < t})}, \quad \hat{A}_{i,t} = \frac{R_i - \text{mean}(\{R_i\}_{i=1}^{G-1}, R_S)}{\text{std}(\{R_i\}_{i=1}^{G-1}, R_S)} \quad (6)$$

There are 3 main difference between Equation (3) and Equation (5):

1. A coefficient for the expert trace loss  $\frac{1}{G|o_S|}$
2. A KL divergence term  $-\beta D_{\text{KL}}(\pi_{\theta} || \pi_{\text{ref}})$
3. An Advantage term  $\min(r_{i,t}(\theta) \hat{A}_{S,t}, \text{clip}(r_{i,t}(\theta), 1 - \varepsilon, 1 + \varepsilon) \hat{A}_{S,t})$

Suppose that  $r_{i,t} \leq 1 + \varepsilon$ , because  $\hat{A}_{S,t} \geq 0$ ,  $\min(r_{i,t}(\theta) \hat{A}_{S,t}, \text{clip}(r_{i,t}(\theta), 1 - \varepsilon, 1 + \varepsilon) \hat{A}_{S,t}) = r_{i,t}(\theta) \hat{A}_{S,t}$ , which is exactly the entropy loss with a coefficient  $\hat{A}_{S,t}$  if we replace  $\pi_{\text{old}}(o_{i,t}|q, o_{i < t})$  in

508  $r_{i,t}(\theta)$  with the one hot embedding of the expert trace tokens. Therefore, GRPO w/ Expert Trace  
 509 can not only have better training consistency, but can also assign different credits according to the  
 510 token probability ratio between the old and the current policy.

---

**Algorithm 3 GRPO w/ Expert Trace (GRPO-ET)**

---

**Require:** Dataset  $\mathcal{D}$ , current policy  $\pi_\theta$ , sampling number  $G$

```

1: procedure GRPO_WITH_EXPERT_TRACE( $\mathcal{D}, \pi_\theta, G$ )
2:   for step = 1, 2, ...,  $N$  do
3:     Sample a batch  $\mathcal{D}_b$  from  $\mathcal{D}$ 
4:     Update the old policy model  $\pi_{\text{old}} \leftarrow \pi_\theta$ 
5:     Sample  $G - 1$  outputs  $\{o_i\}_{i=1}^{G-1} \sim \pi_{\text{old}}(\cdot|Q)$  for each question  $Q \in \mathcal{D}_b$ 
6:     Combine the expert trace with the sampled outputs to construct  $\{\{o_i\}_{i=1}^{G-1}, S\}$ 
7:     Compute rewards  $\{\{r_i\}_{i=1}^{G-1}, r_S\}$  for each sampled output  $o_i$  and expert trace  $S$ 
8:                                      $\triangleright r_S$  is generally 1 because of solution correctness
9:     For each  $o_i$  and expert trace  $S$ , compute  $\hat{A}_{i,t}$  for the  $t$ -th token of  $o_i$  and  $S$ .  $\triangleright$  Equation (4)
10:    for iteration = 1, ...,  $T$  do
11:      Update the policy model  $\pi_\theta$  by maximizing the GRPO-ET objective  $\triangleright$  Equation (3)
12:    end for
13:  end for
14:  return  $\pi_\theta$ 
15: end procedure

```

---

## 511 D Additional Discussion and Analysis of the Markov Model

512 In this section, we present a more detailed and mathematically precise formulation of the Markov  
 513 model introduced in Section 3.1.

514 Recall that we consider a Markov chain with  $K$  states (indexed by  $1, 2, \dots, K$ ) and a  $K \times K$   
 515 transition matrix. We assume that, for the expert/large model, all  $(i \rightarrow j)$  transitions are learnable in  
 516 the transition matrix. However, for a small/student model, not all  $(i \rightarrow j)$  transitions are learnable  
 517 and we denote the learnable state transitions by  $\mathcal{P} \subset [K] \times [K]$  where  $[K] = \{1, 2, \dots, K\}$ .

518 We first introduce the following definition of pretrained small model utilized in our experiments.

519 **Definition 1 (Pretrained Small Model)** *A pretrained small model is defined as a Markov model*  
 520  $\mathcal{M} = (\mathcal{S}, \mathbf{P})$ , *where  $\mathcal{S} = \{1, 2, \dots, K\}$  is the state space and  $\mathbf{P} \in \mathbb{R}^{K \times K}$  is the transition matrix.*  
 521 *The model satisfies the following properties:*

522 • *Let  $d \geq 1$  denote the maximum allowed jump between states. The set of learnable state*  
 523 *transitions  $\mathcal{P}$  satisfies:*

$$(i, j) \in \mathcal{P} \quad \text{if and only if} \quad |i - j| \leq d.$$

524 • *For some  $\epsilon \ll 1/d$ , the transition probabilities satisfy:*

$$\mathbf{P}_{ij} := \mathbb{P}(i \rightarrow j) = \begin{cases} 1 - \Theta(d\epsilon), & \text{if } i = j, \\ \Theta(\epsilon), & \text{if } (i, j) \in \mathcal{P} \text{ and } i \neq j, \\ 0, & \text{if } (i, j) \notin \mathcal{P}. \end{cases}$$

525 Our goal is to finetune a small model defined in Definition 1 to solve the following task:

526 **Definition. Navigation Task:** Start a trace from State 1. Obtain a reward of 1 upon reaching State  $K$ .

527 Note that the number of states  $K$ , the weak transition probability  $\epsilon$ , and the maximal allowed jump  
 528 distance  $d$  control the difficulty of the task. Below, we provide discussions to argue separations of  
 529 **reward probability given fixed trace length** through a **random walk analysis** and a **biased walk**  
 530 **analysis**, where the latter is more favorable to the SFT+RL strategy.

### 531 D.1 Exponential separation between SFT+RL and BREAD via a Random Walk argument

532 • **Trace length to achieve reward at initialization.** The setting in Definition 1 is a variation of  
 533 random walk within the states. We start from State 1 and aim to arrive State  $K$ . At the left and right

side ( $i = 1$  or  $i = K$ ), the walk is asymmetric. However, at the center the walk is random and zero mean. Assuming  $K \gg d$ , the center part will dominate the expected arrival time to the State  $K$ . Secondly, the variance of each step we take is controlled by  $\epsilon$  and  $d$ . Specifically, the variance is  $\sigma^2 = d^2\epsilon$ . Through classical random walk arguments, this implies an expected trace length of  $\Theta(K^2/\sigma^2)$  to hit the final state.

• **Discussion of BREAD-based trace length to achieve reward.** Suppose we are given an expert anchor trace  $[\alpha_0, \alpha_1, \dots, \alpha_T]$  where  $\alpha_i \in [K]$  and  $\alpha_0 = 1 \leq \dots \alpha_{i-1} \leq \alpha_i \dots \leq \alpha_T = K$  and  $|\alpha_i - \alpha_{i+1}| \propto K/T$ . Consider a variation of BREAD where we start from  $\alpha_{T-1}$  generate a rollout until we hit  $\alpha_T$ . As a proxy for BREAD, we train the model to precisely memorize this successful partial trace from  $\alpha_{T-1}$  to  $\alpha_T$ . We then repeat this process by backtracking from  $T$  to  $T-1$  to 1. During inference, we start from State 1 and play the memorized partial traces and stitch them to arrive at State  $K$ . Under this model, each partial trace has an expected length of  $\Theta(K^2/T^2\sigma^2)$ . The stitched trace has a  $\times T$  longer length of  $\Theta(K^2/T\sigma^2)$ .

• **In summary:** BREAD can learn a trace with  $\times T$  shorter trace compared to SFT.

• **Conclusion on exponential separation.** Equipped with these bounds, we can now investigate the RL behavior and the source of sparse reward nature. Recall that SFT is not beneficial because we assume the small model can't fit the observed transitions  $\alpha_0$  to  $\alpha_T$ . Thus, the only chance of RL is utilizing traces sampled from the initialization. If we limit the trace length to  $\Theta(K^2/T\sigma^2)$ , for which BREAD works in expectation, what is the probability of success? The answer in turn governs the sample complexity of the RL strategy that purely rely on the sparse trace-level reward. Through a Chernoff/Hoeffding bound, the probability of success is upper bounded via  $\exp(-\Theta(\frac{(K/\sigma)^2}{K^2/T\sigma^2})) = \exp(-\Theta(T))$ . Thus, under a reasonable trace length for which BREAD can be efficiently supervised and succeed, we require exponentially-many RL rollouts to succeed.

## D.2 Analysis of Reward Probability under a Maximum Trace Length

In this section, we demonstrate that even if the Markov chain is more favorable to pure RL, BREAD has reward densification benefits. Concretely, we consider a biased forward-only Markov chain with the transition matrix  $\tilde{P} \in \mathbb{R}^{K \times K}$  given by

$$\tilde{P}_{ij} := \tilde{\mathbb{P}}(i \rightarrow j) = \begin{cases} 1 - \Theta(d\epsilon), & \text{if } i = j, \\ \Theta(d\epsilon), & \text{if } j = i + d, \\ 0, & \text{otherwise.} \end{cases}$$

By not allowing backward move and ensuring monotonic improvement, this chain makes it easier to reach the destination state.

**Theorem 1** Suppose the maximum trace length satisfies  $T_{\max} = \Theta(K/d)$ , and consider the navigation task where a trajectory starts from State 1 and receives a reward of 1 only upon reaching State  $K$ . Then, a small model defined in Definition 1 achieves an expected reward of  $\epsilon^{O(K/d)}$ .

The theorem highlights a key limitation of applying standard reinforcement learning algorithms (e.g., GRPO) to the navigation task: since these methods rely on observing non-zero reward trajectories to propagate gradients and update model parameters, they are highly inefficient in hard settings. Specifically, in the small model regime, the agent must generate approximately  $\epsilon^{-\Theta(K/d)}$  trajectories before observing a single successful episode that reaches State  $K$ . This exponential sample complexity causes a significant challenge for learning.

In the following section, we introduce the BREAD algorithm of the Markov model that leverages SFT trajectories to improve sample efficiency.

**Definition 2** An SFT trajectory is a sequence  $[\alpha_0, \alpha_1, \dots, \alpha_T]$  where  $\alpha_i \in [K]$  and  $\alpha_0 = 1 \leq \dots \alpha_{i-1} \leq \alpha_i \dots \leq \alpha_T = K$  for  $i \in [T]$ . Define the maximal jump distance of the SFT trajectory by

$$D := \max_{i \in [T]} |\alpha_i - \alpha_{i-1}|.$$

The trajectory is said to be infeasible for a small model defined in Definition 1 with maximum jump distance  $d$  if it contains at least one transition exceeding the allowed jump size. That is  $D > d$ .

Since any infeasible SFT trajectory (cf. Definition 2) contains at least one transition  $(\alpha_{i-1} \rightarrow \alpha_i) \notin \mathcal{P}$ , it is evident that the small model (cf. Definition 1) cannot learn directly from such a trajectory, as the corresponding transitions within the trajectory lie outside its learnable set  $\mathcal{P}$ .

---

#### Algorithm 4 BREAD\_Markov

---

**Require:** An SFT trajectory  $[\alpha_0, \dots, \alpha_T]$ , initial small model  $\mathcal{M}([K], \mathbf{P})$ , reward threshold  $r_{\text{thred}}$ , maximal trajectory length  $T_{\text{max}}$

```

1: for episode  $t = T, T-1, \dots, 1$  do
2:    $r \leftarrow 0$ 
3:   while  $r < r_{\text{thred}}$  do
4:     Sample  $N$  trajectories from  $\mathcal{M}$  starting from state  $\alpha_t$  with maximal length  $T_{\text{max}} - t$ 
5:     Update the current reward:  $r \leftarrow r_{\text{new}}$ 
6:     Update the transition matrix:  $\mathbf{P} \leftarrow \mathbf{P}_{\text{new}}$ 
7:   end while
8: end for

```

---

580

**Theorem 2 (Denser rewards during BREAD training)** *Let an SFT trajectory (cf. Definition 2) has maximal jump distance  $D = \Theta(K/T)$ , and suppose the maximum trace length satisfies  $T_{\text{max}} = T + \Theta(K/dT)$ . Then, by finetuning a small model (cf. Definition 1) using the BREAD algorithm as described in Algorithm 4, the model obtains an expected reward of  $\epsilon^{\Theta(K/Td)}$  at each iteration.*

Theorem 2 demonstrates that compared to the pure RL approach in Theorem 1, the BREAD algorithm achieves substantially denser rewards. Specifically, the exponent improves from  $\Theta(\frac{K}{d})$  to  $\Theta(\frac{K}{Td})$ , while using a shorter trace length. Intuitively, BREAD improves sample efficiency by decomposing the expert’s reasoning into smaller steps, allowing the small model to acquire knowledge one step at a time.

**Experimental settings for Figure 3:** We conduct experiments by finetuning a Markov model (cf. Definition 1) using three different methods: SFT, GRPO, and BREAD. Note that in our experiments, to introduce additional randomness, for each state  $i \in [K]$ , we randomly select one over its connected states (e.g., among  $i-d, \dots, i, i+d$  states) and assign it the highest transition probability of  $1 - \Theta(\epsilon)$ , instead of always assigning the highest probability to  $\mathbb{P}(i \rightarrow i)$ . In both Figs. 3a and 3b,  $d = 2$ ,  $T_{\text{max}} = 2K$  and SFT is infeasible (cf. Definition 2) with length  $T = K/2$ . In Fig. 3a, we fix  $K = 30$  and vary  $\epsilon \in \{0.01, 0.025, 0.05\}$ . In contrast, in Fig. 3b, the  $\epsilon = 0.05$  is remained unchanged and the number of states varies in  $K \in \{30, 50, 100\}$ . Each experiments is trained for 10000 iterations with 1000 trajectories sampled with each iteration.

### 599 D.3 Proof of Theorems 1&2

In this section, we provide the following theorem along with its proof. Theorems 1 and 2 can be directly derived as its corollaries.

**Theorem 3** *Suppose the maximum trace length satisfies  $T_{\text{max}} = \Theta(m)$ , and consider the navigation task where a trajectory starts from State  $i$  and receives a reward of 1 only upon reaching State  $j := (i + md)$ . Then, a small model defined in Definition 1 achieves an expected reward of  $\epsilon^{\Theta(m)}$ .*

**Proof.** Given this navigation task where a reward of 1 is received upon reaching the goal state  $j := i + md$ , the expected can be interpreted as the probability of successfully reaching the final goal with  $T_{\text{max}}$  steps. Define the successfully reaching probability by  $\mathbb{P}(i \rightarrow j; T_{\text{max}})$ . In the following, we derive both lower and upper bounds of this probability.

• **Lower bound:** The lower bound can be easily derived by considering a single successful trajectory, presented as follows

$$(i) \rightarrow (i + d) \rightarrow (i + 2d) \rightarrow \dots \rightarrow (i + md).$$

Given that the probability of each step is  $\Theta(\epsilon)$  following Definition 1 and there are  $m$  steps required, the probability of obtaining such trajectory is  $\Theta(\epsilon^m)$ . It serves as the lower bound of the successfully reaching probability (assuming  $m < T_{\text{max}}$ ) and we have

$$\mathbb{P}(i \rightarrow j; T_{\text{max}}) \geq \Theta(\epsilon^m).$$

614 • **Upper bound:** To obtain the upper bound, we first consider a moving-forward-only Markov chain.  
 615 That is, the transition matrix  $\tilde{\mathbf{P}} \in \mathbb{R}^{K \times K}$  is defined as follows:

$$\tilde{P}_{ij} := \tilde{\mathbb{P}}(i \rightarrow j) = \begin{cases} 1 - \Theta(d\epsilon), & \text{if } i = j, \\ \Theta(d\epsilon), & \text{if } j = i + d, \\ 0, & \text{otherwise.} \end{cases}$$

616 This setup restricts the agent to either stay in the current state or move forward exactly  $d$  steps with  
 617 each transition. Note that  $\tilde{\mathbf{P}}$  has strictly higher successfully reaching probability compared to  $\mathbf{P}$   
 618 in Definition 1. Therefore, we focus on upper bounding the reaching probability of the simplified  
 619 forward-only model, denoted by  $\tilde{\mathbb{P}}(i \rightarrow j; T_{\max})$ .

620 Given the maximal trace length  $T_{\max}$ , at each timestep, the agent can either stay in the current state or  
 621 move forward to the state that is  $d$  steps away. Then as long as at least  $m$  out of the total  $T_{\max}$  are  
 622 forward transitions, the agent will reach the final goal state within  $T_{\max}$  steps. Therefore, we have

$$\begin{aligned} \tilde{\mathbb{P}}(i \rightarrow j; T_{\max}) &= \sum_{m'=m}^{T_{\max}} \binom{T_{\max}}{m'} \Theta(d\epsilon)^{m'} (1 - \Theta(d\epsilon))^{T_{\max}-m'} \\ &\leq 2^{T_{\max}} \Theta(d\epsilon)^m. \end{aligned}$$

623 Given that  $T_{\max} \leq C \cdot m$  with  $C \ll \log(1/d\epsilon)$ , we get

$$\mathbb{P}(i \rightarrow j; T_{\max}) \leq \tilde{\mathbb{P}}(i \rightarrow j; T_{\max}) \leq (d\epsilon)^{\Theta(m)}.$$

624 Combining lower and upper bound, and considering a constant jump distance  $d \ll \epsilon^{-1}$ , it completes  
 625 the proof. ■

## NeurIPS Paper Checklist

The checklist is designed to encourage best practices for responsible machine learning research, addressing issues of reproducibility, transparency, research ethics, and societal impact. Do not remove the checklist: **The papers not including the checklist will be desk rejected.** The checklist should follow the references and follow the (optional) supplemental material. The checklist does NOT count towards the page limit.

Please read the checklist guidelines carefully for information on how to answer these questions. For each question in the checklist:

- You should answer [Yes], [No], or [NA].
- [NA] means either that the question is Not Applicable for that particular paper or the relevant information is Not Available.
- Please provide a short (1–2 sentence) justification right after your answer (even for NA).

**The checklist answers are an integral part of your paper submission.** They are visible to the reviewers, area chairs, senior area chairs, and ethics reviewers. You will be asked to also include it (after eventual revisions) with the final version of your paper, and its final version will be published with the paper.

The reviewers of your paper will be asked to use the checklist as one of the factors in their evaluation. While "[Yes]" is generally preferable to "[No]", it is perfectly acceptable to answer "[No]" provided a proper justification is given (e.g., "error bars are not reported because it would be too computationally expensive" or "we were unable to find the license for the dataset we used"). In general, answering "[No]" or "[NA]" is not grounds for rejection. While the questions are phrased in a binary way, we acknowledge that the true answer is often more nuanced, so please just use your best judgment and write a justification to elaborate. All supporting evidence can appear either in the main paper or the supplemental material, provided in appendix. If you answer [Yes] to a question, in the justification please point to the section(s) where related material for the question can be found.

IMPORTANT, please:

- **Delete this instruction block, but keep the section heading “NeurIPS Paper Checklist”,**
- **Keep the checklist subsection headings, questions/answers and guidelines below.**
- **Do not modify the questions and only use the provided macros for your answers.**

### 1. Claims

Question: Do the main claims made in the abstract and introduction accurately reflect the paper’s contributions and scope?

Answer: [Yes]

Justification: We list our contribution in the end of the introduction section Section 1, which are supported by later methodology Section 3 and experiment sections Section 4.

Guidelines:

- The answer NA means that the abstract and introduction do not include the claims made in the paper.
- The abstract and/or introduction should clearly state the claims made, including the contributions made in the paper and important assumptions and limitations. A No or NA answer to this question will not be perceived well by the reviewers.
- The claims made should match theoretical and experimental results, and reflect how much the results can be expected to generalize to other settings.
- It is fine to include aspirational goals as motivation as long as it is clear that these goals are not attained by the paper.

### 2. Limitations

Question: Does the paper discuss the limitations of the work performed by the authors?

Answer: [Yes]

Justification: We discuss the limitation in the last section (Section 5).

Guidelines:

- The answer NA means that the paper has no limitation while the answer No means that the paper has limitations, but those are not discussed in the paper.
- The authors are encouraged to create a separate "Limitations" section in their paper.
- The paper should point out any strong assumptions and how robust the results are to violations of these assumptions (e.g., independence assumptions, noiseless settings, model well-specification, asymptotic approximations only holding locally). The authors should reflect on how these assumptions might be violated in practice and what the implications would be.
- The authors should reflect on the scope of the claims made, e.g., if the approach was only tested on a few datasets or with a few runs. In general, empirical results often depend on implicit assumptions, which should be articulated.
- The authors should reflect on the factors that influence the performance of the approach. For example, a facial recognition algorithm may perform poorly when image resolution is low or images are taken in low lighting. Or a speech-to-text system might not be used reliably to provide closed captions for online lectures because it fails to handle technical jargon.
- The authors should discuss the computational efficiency of the proposed algorithms and how they scale with dataset size.
- If applicable, the authors should discuss possible limitations of their approach to address problems of privacy and fairness.
- While the authors might fear that complete honesty about limitations might be used by reviewers as grounds for rejection, a worse outcome might be that reviewers discover limitations that aren't acknowledged in the paper. The authors should use their best judgment and recognize that individual actions in favor of transparency play an important role in developing norms that preserve the integrity of the community. Reviewers will be specifically instructed to not penalize honesty concerning limitations.

### 3. Theory assumptions and proofs

Question: For each theoretical result, does the paper provide the full set of assumptions and a complete (and correct) proof?

Answer: [\[Yes\]](#)

Justification: In the Section 3.1, we define our theoretical model and prove our claims in details.

Guidelines:

- The answer NA means that the paper does not include theoretical results.
- All the theorems, formulas, and proofs in the paper should be numbered and cross-referenced.
- All assumptions should be clearly stated or referenced in the statement of any theorems.
- The proofs can either appear in the main paper or the supplemental material, but if they appear in the supplemental material, the authors are encouraged to provide a short proof sketch to provide intuition.
- Inversely, any informal proof provided in the core of the paper should be complemented by formal proofs provided in appendix or supplemental material.
- Theorems and Lemmas that the proof relies upon should be properly referenced.

### 4. Experimental result reproducibility

Question: Does the paper fully disclose all the information needed to reproduce the main experimental results of the paper to the extent that it affects the main claims and/or conclusions of the paper (regardless of whether the code and data are provided or not)?

Answer: [\[Yes\]](#)

Justification: We describe the main steps to reproduce our experiments including algorithm, dataset and base models in Section 3 and Section 4. We also provided details about algorithms and hyperparameters in the Appendix.

Guidelines:

- The answer NA means that the paper does not include experiments.
- If the paper includes experiments, a No answer to this question will not be perceived well by the reviewers: Making the paper reproducible is important, regardless of whether the code and data are provided or not.
- If the contribution is a dataset and/or model, the authors should describe the steps taken to make their results reproducible or verifiable.
- Depending on the contribution, reproducibility can be accomplished in various ways. For example, if the contribution is a novel architecture, describing the architecture fully might suffice, or if the contribution is a specific model and empirical evaluation, it may be necessary to either make it possible for others to replicate the model with the same dataset, or provide access to the model. In general, releasing code and data is often one good way to accomplish this, but reproducibility can also be provided via detailed instructions for how to replicate the results, access to a hosted model (e.g., in the case of a large language model), releasing of a model checkpoint, or other means that are appropriate to the research performed.
- While NeurIPS does not require releasing code, the conference does require all submissions to provide some reasonable avenue for reproducibility, which may depend on the nature of the contribution. For example
  - (a) If the contribution is primarily a new algorithm, the paper should make it clear how to reproduce that algorithm.
  - (b) If the contribution is primarily a new model architecture, the paper should describe the architecture clearly and fully.
  - (c) If the contribution is a new model (e.g., a large language model), then there should either be a way to access this model for reproducing the results or a way to reproduce the model (e.g., with an open-source dataset or instructions for how to construct the dataset).
  - (d) We recognize that reproducibility may be tricky in some cases, in which case authors are welcome to describe the particular way they provide for reproducibility. In the case of closed-source models, it may be that access to the model is limited in some way (e.g., to registered users), but it should be possible for other researchers to have some path to reproducing or verifying the results.

## 5. Open access to data and code

Question: Does the paper provide open access to the data and code, with sufficient instructions to faithfully reproduce the main experimental results, as described in supplemental material?

Answer: [Yes]

Justification: We include our code in the supplementary materials and will also provide checkpoints to make sure our experiments are reproducible.

Guidelines:

- The answer NA means that paper does not include experiments requiring code.
- Please see the NeurIPS code and data submission guidelines (<https://nips.cc/public/guides/CodeSubmissionPolicy>) for more details.
- While we encourage the release of code and data, we understand that this might not be possible, so “No” is an acceptable answer. Papers cannot be rejected simply for not including code, unless this is central to the contribution (e.g., for a new open-source benchmark).
- The instructions should contain the exact command and environment needed to run to reproduce the results. See the NeurIPS code and data submission guidelines (<https://nips.cc/public/guides/CodeSubmissionPolicy>) for more details.
- The authors should provide instructions on data access and preparation, including how to access the raw data, preprocessed data, intermediate data, and generated data, etc.
- The authors should provide scripts to reproduce all experimental results for the new proposed method and baselines. If only a subset of experiments are reproducible, they should state which ones are omitted from the script and why.

- At submission time, to preserve anonymity, the authors should release anonymized versions (if applicable).
- Providing as much information as possible in supplemental material (appended to the paper) is recommended, but including URLs to data and code is permitted.

## 6. Experimental setting/details

Question: Does the paper specify all the training and test details (e.g., data splits, hyper-parameters, how they were chosen, type of optimizer, etc.) necessary to understand the results?

Answer: [\[Yes\]](#)

Justification: The experiment details are stated in Section 4 and the Appendix.

Guidelines:

- The answer NA means that the paper does not include experiments.
- The experimental setting should be presented in the core of the paper to a level of detail that is necessary to appreciate the results and make sense of them.
- The full details can be provided either with the code, in appendix, or as supplemental material.

## 7. Experiment statistical significance

Question: Does the paper report error bars suitably and correctly defined or other appropriate information about the statistical significance of the experiments?

Answer: [\[Yes\]](#)

Justification: We use several large datasets with several base models to demonstrate the generalization ability of our methods.

Guidelines:

- The answer NA means that the paper does not include experiments.
- The authors should answer "Yes" if the results are accompanied by error bars, confidence intervals, or statistical significance tests, at least for the experiments that support the main claims of the paper.
- The factors of variability that the error bars are capturing should be clearly stated (for example, train/test split, initialization, random drawing of some parameter, or overall run with given experimental conditions).
- The method for calculating the error bars should be explained (closed form formula, call to a library function, bootstrap, etc.)
- The assumptions made should be given (e.g., Normally distributed errors).
- It should be clear whether the error bar is the standard deviation or the standard error of the mean.
- It is OK to report 1-sigma error bars, but one should state it. The authors should preferably report a 2-sigma error bar than state that they have a 96% CI, if the hypothesis of Normality of errors is not verified.
- For asymmetric distributions, the authors should be careful not to show in tables or figures symmetric error bars that would yield results that are out of range (e.g. negative error rates).
- If error bars are reported in tables or plots, The authors should explain in the text how they were calculated and reference the corresponding figures or tables in the text.

## 8. Experiments compute resources

Question: For each experiment, does the paper provide sufficient information on the computer resources (type of compute workers, memory, time of execution) needed to reproduce the experiments?

Answer: [\[Yes\]](#)

Justification: We provide the computation resources needed in the Appendix.

Guidelines:

- The answer NA means that the paper does not include experiments.

- The paper should indicate the type of compute workers CPU or GPU, internal cluster, or cloud provider, including relevant memory and storage.
- The paper should provide the amount of compute required for each of the individual experimental runs as well as estimate the total compute.
- The paper should disclose whether the full research project required more compute than the experiments reported in the paper (e.g., preliminary or failed experiments that didn't make it into the paper).

## 9. Code of ethics

Question: Does the research conducted in the paper conform, in every respect, with the NeurIPS Code of Ethics <https://neurips.cc/public/EthicsGuidelines>?

Answer: [Yes]

Justification: This paper does not contain anything that is harmful potentially.

Guidelines:

- The answer NA means that the authors have not reviewed the NeurIPS Code of Ethics.
- If the authors answer No, they should explain the special circumstances that require a deviation from the Code of Ethics.
- The authors should make sure to preserve anonymity (e.g., if there is a special consideration due to laws or regulations in their jurisdiction).

## 10. Broader impacts

Question: Does the paper discuss both potential positive societal impacts and negative societal impacts of the work performed?

Answer: [Yes]

Justification: We discuss the broader impact which is also potential positive societal impacts in Section 5.

Guidelines:

- The answer NA means that there is no societal impact of the work performed.
- If the authors answer NA or No, they should explain why their work has no societal impact or why the paper does not address societal impact.
- Examples of negative societal impacts include potential malicious or unintended uses (e.g., disinformation, generating fake profiles, surveillance), fairness considerations (e.g., deployment of technologies that could make decisions that unfairly impact specific groups), privacy considerations, and security considerations.
- The conference expects that many papers will be foundational research and not tied to particular applications, let alone deployments. However, if there is a direct path to any negative applications, the authors should point it out. For example, it is legitimate to point out that an improvement in the quality of generative models could be used to generate deepfakes for disinformation. On the other hand, it is not needed to point out that a generic algorithm for optimizing neural networks could enable people to train models that generate Deepfakes faster.
- The authors should consider possible harms that could arise when the technology is being used as intended and functioning correctly, harms that could arise when the technology is being used as intended but gives incorrect results, and harms following from (intentional or unintentional) misuse of the technology.
- If there are negative societal impacts, the authors could also discuss possible mitigation strategies (e.g., gated release of models, providing defenses in addition to attacks, mechanisms for monitoring misuse, mechanisms to monitor how a system learns from feedback over time, improving the efficiency and accessibility of ML).

## 11. Safeguards

Question: Does the paper describe safeguards that have been put in place for responsible release of data or models that have a high risk for misuse (e.g., pretrained language models, image generators, or scraped datasets)?

Answer: [NA]

Justification: This paper does not have negative impacts potentially.

Guidelines:

- The answer NA means that the paper poses no such risks.
- Released models that have a high risk for misuse or dual-use should be released with necessary safeguards to allow for controlled use of the model, for example by requiring that users adhere to usage guidelines or restrictions to access the model or implementing safety filters.
- Datasets that have been scraped from the Internet could pose safety risks. The authors should describe how they avoided releasing unsafe images.
- We recognize that providing effective safeguards is challenging, and many papers do not require this, but we encourage authors to take this into account and make a best faith effort.

## 12. Licenses for existing assets

Question: Are the creators or original owners of assets (e.g., code, data, models), used in the paper, properly credited and are the license and terms of use explicitly mentioned and properly respected?

Answer: [Yes]

Justification: We correctly cite all codebase and datasets that is used during our experiments in Section 4 and Appendix.

Guidelines:

- The answer NA means that the paper does not use existing assets.
- The authors should cite the original paper that produced the code package or dataset.
- The authors should state which version of the asset is used and, if possible, include a URL.
- The name of the license (e.g., CC-BY 4.0) should be included for each asset.
- For scraped data from a particular source (e.g., website), the copyright and terms of service of that source should be provided.
- If assets are released, the license, copyright information, and terms of use in the package should be provided. For popular datasets, [paperswithcode.com/datasets](https://paperswithcode.com/datasets) has curated licenses for some datasets. Their licensing guide can help determine the license of a dataset.
- For existing datasets that are re-packaged, both the original license and the license of the derived asset (if it has changed) should be provided.
- If this information is not available online, the authors are encouraged to reach out to the asset's creators.

## 13. New assets

Question: Are new assets introduced in the paper well documented and is the documentation provided alongside the assets?

Answer: [Yes]

Justification: We include our code for data generation, model training and inference and result aggregation in the supplementary zip file.

Guidelines:

- The answer NA means that the paper does not release new assets.
- Researchers should communicate the details of the dataset/code/model as part of their submissions via structured templates. This includes details about training, license, limitations, etc.
- The paper should discuss whether and how consent was obtained from people whose asset is used.
- At submission time, remember to anonymize your assets (if applicable). You can either create an anonymized URL or include an anonymized zip file.

## 14. Crowdsourcing and research with human subjects

Question: For crowdsourcing experiments and research with human subjects, does the paper include the full text of instructions given to participants and screenshots, if applicable, as well as details about compensation (if any)?

Answer: [NA]

Justification: This paper does not relate to human subject study.

Guidelines:

- The answer NA means that the paper does not involve crowdsourcing nor research with human subjects.
- Including this information in the supplemental material is fine, but if the main contribution of the paper involves human subjects, then as much detail as possible should be included in the main paper.
- According to the NeurIPS Code of Ethics, workers involved in data collection, curation, or other labor should be paid at least the minimum wage in the country of the data collector.

#### 15. Institutional review board (IRB) approvals or equivalent for research with human subjects

Question: Does the paper describe potential risks incurred by study participants, whether such risks were disclosed to the subjects, and whether Institutional Review Board (IRB) approvals (or an equivalent approval/review based on the requirements of your country or institution) were obtained?

Answer: [NA]

Justification: This paper does not relate to human subject study.

Guidelines:

- The answer NA means that the paper does not involve crowdsourcing nor research with human subjects.
- Depending on the country in which research is conducted, IRB approval (or equivalent) may be required for any human subjects research. If you obtained IRB approval, you should clearly state this in the paper.
- We recognize that the procedures for this may vary significantly between institutions and locations, and we expect authors to adhere to the NeurIPS Code of Ethics and the guidelines for their institution.
- For initial submissions, do not include any information that would break anonymity (if applicable), such as the institution conducting the review.

#### 16. Declaration of LLM usage

Question: Does the paper describe the usage of LLMs if it is an important, original, or non-standard component of the core methods in this research? Note that if the LLM is used only for writing, editing, or formatting purposes and does not impact the core methodology, scientific rigor, or originality of the research, declaration is not required.

Answer: [NA]

Justification: The development and design of our method does not involve LLMs.

Guidelines:

- The answer NA means that the core method development in this research does not involve LLMs as any important, original, or non-standard components.
- Please refer to our LLM policy (<https://neurips.cc/Conferences/2025/LLM>) for what should or should not be described.
